# Supplementary material
Source: HighWire-hosted journal article supplement (https://jnm.snmjournals.org/highwire/filestream/94720/field_highwire_adjunct_files/0/158626_Supplemental_Data.pdf)
Supplement: 158626_Supplemental_Data.pdf [file 158626_Supplemental_Data.pdf]

| <b>Supplemental Table 1. Patient demographics and clinical characteristics at initial presentation prior to the first Ra-223 dose.</b> |        |                 |      | Subgroup of 42 patients with <i>baseline</i> Fluoride-PET/CT |      |
|----------------------------------------------------------------------------------------------------------------------------------------|--------|-----------------|------|--------------------------------------------------------------|------|
|                                                                                                                                        |        | All 76 patients |      |                                                              |      |
|                                                                                                                                        |        | No.             | %    | No.                                                          | %    |
| Age                                                                                                                                    | Median | 70.1            |      | 71.7                                                         |      |
|                                                                                                                                        | Range  | 43 – 89         |      | 43 - 88                                                      |      |
| Gleason score                                                                                                                          | 10     | 4               | 5.3  | 4                                                            | 9.5  |
|                                                                                                                                        | 9      | 35              | 46.1 | 18                                                           | 42.9 |
|                                                                                                                                        | 8      | 12              | 15.8 | 5                                                            | 11.9 |
|                                                                                                                                        | 7      | 15              | 19.7 | 8                                                            | 19.0 |
|                                                                                                                                        | 6      | 3               | 3.9  | 1                                                            | 2.4  |
|                                                                                                                                        | N/A    | 7               | 9.2  | 6                                                            | 14.3 |
| Primary tumor stage                                                                                                                    | T4     | 1               | 1.3  | 0                                                            | 0    |
|                                                                                                                                        | T3c    | 0               | 0    | 0                                                            | 0    |
|                                                                                                                                        | T3b    | 25              | 32.9 | 14                                                           | 33.3 |
|                                                                                                                                        | T3a    | 11              | 14.5 | 9                                                            | 21.4 |
|                                                                                                                                        | T2c    | 6               | 7.9  | 1                                                            | 2.4  |
|                                                                                                                                        | T2b    | 4               | 5.3  | 2                                                            | 4.8  |
|                                                                                                                                        | T2a    | 4               | 5.3  | 1                                                            | 2.4  |
|                                                                                                                                        | N/A    | 25              | 32.9 | 15                                                           | 35.7 |
| Clinical stage                                                                                                                         | IV     | 36              | 47.4 | 16                                                           | 38.1 |
|                                                                                                                                        | III    | 26              | 34.2 | 20                                                           | 47.6 |

|                                                                     |             |            |      |            |      |
|---------------------------------------------------------------------|-------------|------------|------|------------|------|
|                                                                     | IIB         | 12         | 15.8 | 4          | 9.5  |
|                                                                     | N/A         | 2          | 2.6  | 2          | 4.8  |
| Performance Status<br>(ECOG) at first Ra-223<br>dose                | 0           | 21         | 27.6 | 10         | 24.4 |
|                                                                     | 1           | 30         | 39.5 | 15         | 36.6 |
|                                                                     | 2           | 19         | 25.0 | 12         | 29.3 |
|                                                                     | 3           | 6          | 7.9  | 4          | 9.8  |
|                                                                     | 4           | 0          | 0.0  | 0          | 0.0  |
| WHO Pain scale                                                      | 0           | 23         | 30.3 | 13         | 31.7 |
|                                                                     | 1           | 18         | 23.7 | 7          | 17.1 |
|                                                                     | 2           | 26         | 34.2 | 16         | 39.0 |
|                                                                     | 3           | 9          | 11.8 | 5          | 12.2 |
|                                                                     | 4           | 0          | 0.0  | 0          | 0.0  |
| Chemotherapy                                                        |             | 38         | 50.0 | 22         | 52.4 |
| Time of last chemotherapy<br>cycle prior to first Ra-223<br>(weeks) | Median      | 7.3        |      | 6.5        |      |
|                                                                     | Range       | 0.9 – 53.9 |      | 0.9 – 53.9 |      |
| EBRT                                                                |             | 13         | 17.1 | 6          | 14.3 |
| Time of last EBRT prior to<br>first Ra-223 (weeks)                  | Median      | 7.3        |      | 5.5        |      |
|                                                                     | Range       | 0.9 – 69.1 |      | 0.9 – 53.9 |      |
| Ra-223 doses                                                        | Total       | 389        |      | 201        |      |
|                                                                     | Completed   | 44         | 57.9 | 19         | 45.2 |
|                                                                     | In Progress | 1          | 1.3  | 1          | 2.4  |
|                                                                     | Stopped     | 31         | 40.8 | 22         | 52.4 |

|                                      |        |               |              |
|--------------------------------------|--------|---------------|--------------|
| PSA ( $\mu\text{g/liter}$ )          | Median | 38.45         | 54.0         |
|                                      | Range  | 0.72432.6     | 1.0 – 1778.0 |
| ALP (U/liter)                        | Median | 131.5         | 137          |
|                                      | Range  | 48.0 – 913.00 | 48.0 – 913.0 |
| Hemoglobin (g/dL)                    | Median | 11.6          | 11.0         |
|                                      | Range  | 6.6 – 15.6    | 6.6 – 15.1   |
| Platelet counts (K/uL)               | Median | 188           | 187          |
|                                      | Range  | 102 – 413     | 114 – 413    |
| Absolute Neutrophil<br>Counts (K/uL) | Median | 4.55          | 4.51         |
|                                      | Range  | 1.2 – 21.4    | 1.5 – 21.4   |

| <b>Supplemental Table 2. Clinical characteristics of patient groups at initial presentation prior to the first Ra-223 dose in relation to the type of scans performed.</b> |                                             |                                                            |
|----------------------------------------------------------------------------------------------------------------------------------------------------------------------------|---------------------------------------------|------------------------------------------------------------|
|                                                                                                                                                                            | <b>Patients submitted only to bone scan</b> | <b>Patients submitted to bone scan and fluoride-PET/CT</b> |
|                                                                                                                                                                            | <b>N=32</b>                                 | <b>N=38</b>                                                |
| Gleason scores 8-10                                                                                                                                                        | 59%                                         | 60%                                                        |
| Stages III and IV                                                                                                                                                          | 76%                                         | 84%                                                        |
| Mean number of bone metastases                                                                                                                                             | 20-50                                       | 20-50                                                      |
| Median number of bone metastases                                                                                                                                           | 20-50                                       | 20-50                                                      |
| Deaths                                                                                                                                                                     | 51.5%                                       | 52.6%                                                      |
